# Supplementary material for: Molecularly imprinted nanoparticle-based assay (MINA) for microcystin-LR detection in water
Source: Royal Society of Chemistry journal article supplement (doi:10.1039/d2an01680j), 2022-12-14
Supplement: d2an01680j1.pdf [file d2an01680j1.pdf]

# Molecularly Imprinted Nanoparticle-Based Assay (MINA) for Microcystin-LR Detection in Water

*Yadiris García,<sup>1\*</sup> Myleidi Vera,<sup>2</sup> Verónica A. Jiménez,<sup>1</sup> Luis F. Barraza,<sup>1</sup> Joao Aguilar,<sup>2</sup>  
Susana Sánchez,<sup>2</sup> and Eduardo D. Pereira<sup>3\*</sup>*

<sup>1</sup>Departamento de Ciencias Químicas, Facultad de Ciencias Exactas, Universidad Andres Bello, Sede Concepción, Autopista Concepción-Talcahuano 7100, Talcahuano, Chile.

<sup>2</sup>Departamento de Polímeros, Facultad de Ciencias Químicas, Universidad de Concepción, Casilla 160-C, Concepción, Chile.

<sup>3</sup>Departamento de Química Analítica e Inorgánica Facultad de Ciencias Químicas, Universidad de Concepción, Casilla 160-C, Concepción, Chile.

**Table S1.** Virtual library of functional monomers

|    |                                                        |
|----|--------------------------------------------------------|
| 1  | 1-vinylimidazole                                       |
| 2  | 1-vinylimidazole +                                     |
| 3  | 2-hydroxyethyl methacrylate                            |
| 4  | 4-vinylpyridine                                        |
| 5  | Acrylamide                                             |
| 6  | Acrylic acid                                           |
| 7  | Acrylic acid -                                         |
| 8  | p-Divinylbenzene                                       |
| 9  | Ethylene glycol dimethacrylate (EGDMA)                 |
| 10 | Itaconic acid                                          |
| 11 | Itaconic acid 2-                                       |
| 12 | m-Divinylbenzene                                       |
| 13 | <i>N,N'</i> -methylene <i>bis</i> acrylamide           |
| 14 | Methacrylic acid                                       |
| 15 | Methacrylic acid -                                     |
| 16 | Styrene                                                |
| 17 | <i>N,N</i> -diethylamino ethyl methacrylate (DEAEM)    |
| 18 | <i>N,N</i> -diethylamino ethyl methacrylate + (DEAEM+) |
| 19 | Trifluoromethacrylic acid                              |
| 20 | Trifluoromethacrylic acid -                            |
| 21 | <i>N</i> -vinyl formamide                              |
| 22 | 2, 6-bis(acrylamido) pyridine                          |
| 23 | <i>N</i> -[2-(1(3)H-imidazol-4-yl)ethyl]-acrylamide    |
| 24 | 2-methacrylamido pyridine                              |
| 25 | <i>N,N'</i> -diethyl(4-vinylphenyl)amidine             |
| 26 | Monoacryloxyethyl phosphate                            |
| 27 | Dansyl allylamide                                      |
| 28 | 4-vinylpyridine +                                      |
| 29 | 2-vinylpyridine                                        |
| 30 | 2-vinylpyridine +                                      |
| 31 | NPEDMA +                                               |
| 32 | Methacrylamide                                         |
| 33 | EGMP                                                   |
| 34 | EGMP 2-                                                |
| 35 | PETRA                                                  |
| 36 | EBA                                                    |
| 37 | BTFMU                                                  |
| 38 | 2-(dimethylamino)ethyl acrylate                        |
| 39 | 2-N-Morpholinoethyl methacrylate                       |
| 40 | 3-(dimethylamino)propyl acrylate                       |
| 41 | 4-acryloylmorpholine                                   |
| 42 | Bis[2-(methacryloyloxy)ethyl] phosphate                |
| 43 | <i>N,N</i> -diethylmethacrylamide                      |

|    |                                                                  |
|----|------------------------------------------------------------------|
| 44 | <i>N,N</i> -dimethylacrylamide                                   |
| 45 | <i>N</i> -(hydroxymethyl)acrylamide                              |
| 46 | <i>N</i> -Acryloylamido-ethoxyethanol                            |
| 47 | <i>N</i> -Hydroxyethyl acrylamide                                |
| 48 | 2-(2-Oxo-1-imidazolidinyl)ethyl methacrylate                     |
| 49 | 2-aminoethyl methacrylate                                        |
| 50 | 2-Carboxyethyl acrylate                                          |
| 51 | <i>N</i> -Isopropylacrylamide                                    |
| 52 | <i>N</i> -allylthiourea                                          |
| 53 | <i>N-tert</i> -butylacrylamide                                   |
| 54 | <i>N</i> -(3-aminopropyl) methacrylamide                         |
| 55 | BTFMT                                                            |
| 56 | BMBVPU                                                           |
| 57 | 2-(diethylamino)ethyl methacrylate                               |
| 58 | Di(ethylene glycol)diacrylate                                    |
| 59 | <i>N</i> -2-propenyl-(5-dimethylamino)-1-naphthalene sulfonamide |
| 60 | BMBVPU 1 (linear)                                                |
| 61 | Monoacryloxyethyl phosphate -                                    |
| 62 | 2-(diethylamino)ethyl methacrylate +                             |
| 63 | 2-aminoethyl methacrylate +                                      |
| 64 | <i>N</i> -(3-aminopropyl) methacrylamide +                       |
| 65 | 4-acryloylmorpholine +                                           |
| 66 | 3-(dimethylamino)propyl acrylate +                               |
| 67 | 2-(dimethylamino)ethyl acrylate +                                |
| 68 | 2- <i>N</i> -Morpholinoethyl methacrylate +                      |
| 69 | EBA +                                                            |

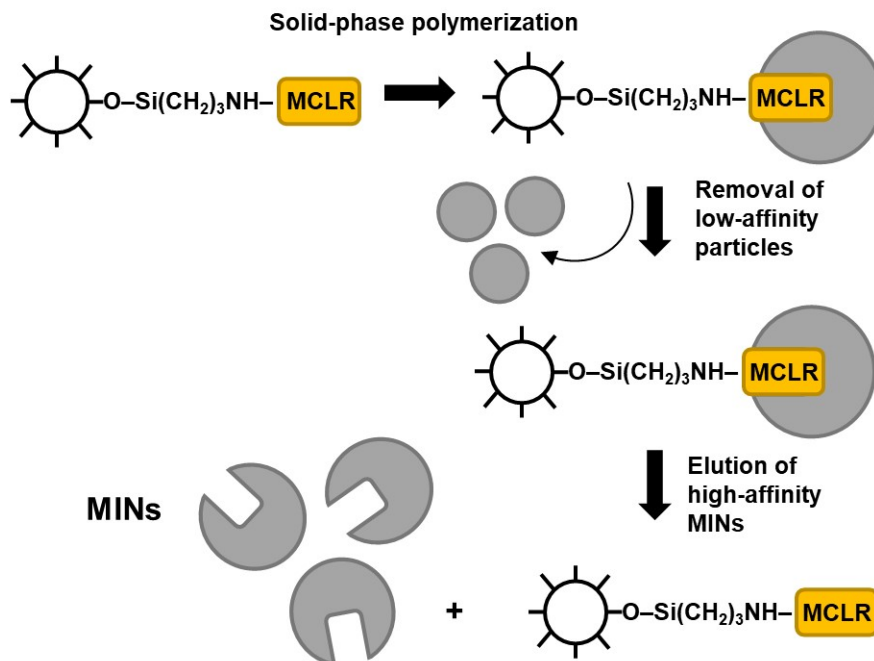

**Figure S1.** Schematic representation of the solid-phase synthesis of MINs for MC-LR recognition.

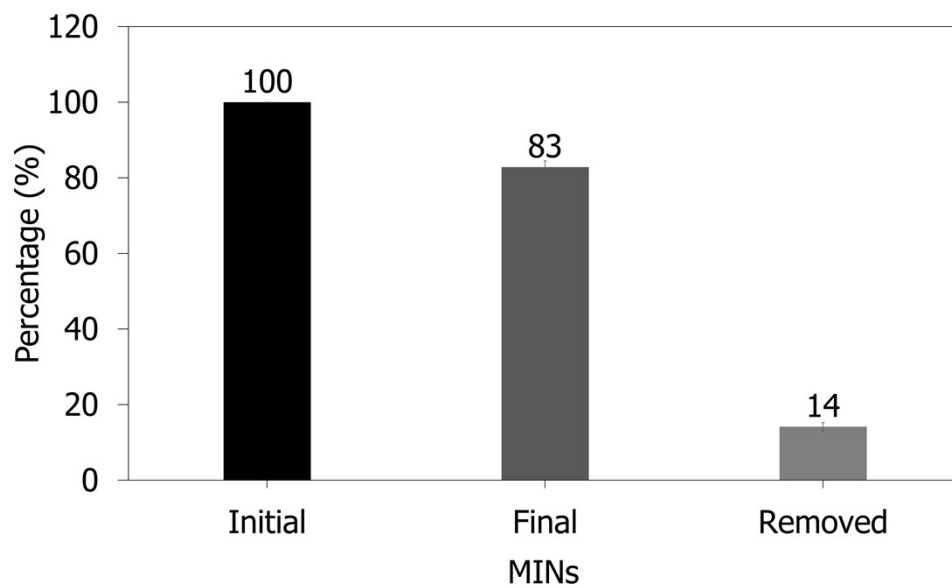

**Figure S2.** MIN leaching during the development of MINA protocol.

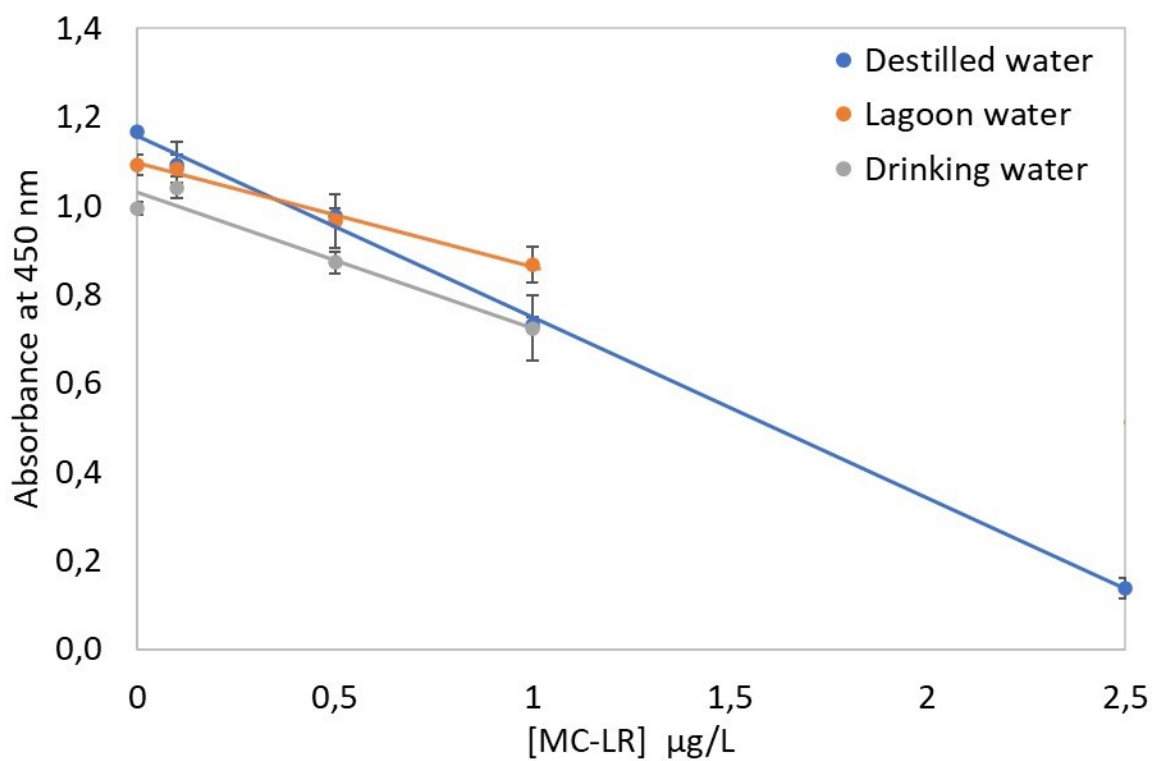

**Figure S3.** Determination of MC-LR concentration in aqueous samples (distilled water, lagoon water and drinking water) using the antibody-based commercial assay Abnova, Microcystin-LR ELISA Kit, LOD 0.10 nmol L<sup>-1</sup>)
